# Supplementary material for: Genetic risk for Alzheimer’s disease, and differential trajectories in circulating blood biomarkers in UK Biobank (n=17,817)
Source: Research Square preprint supplement (doi:10.21203/rs.3.rs-6802545/v1), 2025-08-13
Supplement: Supplementary file 1 [file d04caee0d3273f5a40345193.xlsx]

## Sheet: Suppl Table 1
Supplementary Table 1: raw change statistics for all biomarkers
Paired Samples T-Test
Measure 1				Measure 2		Test		Statistic		z		df		p		Location Parameter		SE Difference		Effect Size		SE Effect Size
albumin_repeat		-		albumin		Student		22.666				13362		1.225×10-111		0.514		0.023		0.196		0.009
						Wilcoxon		5.443×10+7		22.281				5.666×10-110		0.51				0.223		0.01
alk_phosphate_repeat		-		alk_phosphate		Student		17.226				16532		6.401×10-66		2.388		0.139		0.134		0.006
						Wilcoxon		7.989×10+7		19.816				2.173×10-87		2				0.178		0.009
alanine_repeat		-		alanine		Student		-4.048				16526		5.196×10-5		-0.419		0.103		-0.031		0.008
						Wilcoxon		6.584×10+7		-3.886				1.018×10-4		-0.22				-0.035		0.009
LDL_repeat		-		LDL		Student		0.963				16454		0.335		0.006		0.006		0.008		0.007
						Wilcoxon		7.400×10+7		10.543				5.471×10-26		0.051				0.095		0.009
HDL_repeat		-		HDL		Student		37.289				13358		1.321×10-289		0.069		0.002		0.323		0.005
						Wilcoxon		6.084×10+7		36.954				6.390×10-299		0.066				0.37		0.01
aspartate_repeat		-		aspartate		Student		5.214				16412		1.873×10-7		0.433		0.083		0.041		0.009
						Wilcoxon		7.215×10+7		9.837				7.801×10-23		0.4				0.089		0.009
bilirubin_dir_repeat		-		bilirubin_dir		Student		-7.903				12570		2.939×10-15		-0.044		0.006		-0.07		0.007
						Wilcoxon		3.487×10+7		-9.963				2.210×10-23		-0.045				-0.103		0.01
urea_repeat		-		urea		Student		18.087				16504		2.015×10-72		0.171		0.009		0.141		0.007
						Wilcoxon		7.811×10+7		17.398				8.553×10-68		0.155				0.157		0.009
calcium_repeat		-		calcium		Student		36.836				13359		5.415×10-283		0.033		8.872×10-4		0.319		0.01
						Wilcoxon		5.998×10+7		35.544				1.022×10-276		0.031				0.356		0.01
total_chol_repeat		-		total_chol		Student		4.531				16539		5.910×10-6		0.034		0.007		0.035		0.006
						Wilcoxon		7.651×10+7		13.417				4.783×10-41		0.087				0.121		0.009
creatinine_repeat		-		creatinine		Student		28.889				16496		4.646×10-179		2.43		0.084		0.225		0.005
						Wilcoxon		8.785×10+7		34.277				1.698×10-257		2.15				0.309		0.009
ApoA_repeat		-		ApoA		Student		33.704				13219		5.611×10-239		0.053		0.002		0.293		0.006
						Wilcoxon		5.833×10+7		34.026				9.342×10-254		0.052				0.342		0.01
ApoB_repeat		-		ApoB		Student		-1.272				16404		0.203		-0.002		0.002		-0.01		0.006
						Wilcoxon		7.132×10+7		7.225				4.994×10-13		0.009				0.065		0.009
cystatin_c_repeat		-		cystatin_c		Student		36.936				16524		4.963×10-287		0.028		7.638×10-4		0.287		0.005
						Wilcoxon		9.233×10+7		40.875				0		0.025				0.368		0.009
gamma_glut_repeat		-		gamma_glut		Student		-0.921				16521		0.357		-0.203		0.22		-0.007		0.006
						Wilcoxon		6.414×10+7		-5.048				4.460×10-7		-0.3				-0.046		0.009
glucose_repeat		-		glucose		Student		2.976				13339		0.003		0.029		0.01		0.026		0.009
						Wilcoxon		4.778×10+7		7.56				4.032×10-14		0.044				0.076		0.01
hba1c_repeat		-		hba1c		Student		22.558				12804		1.581×10-110		0.799		0.035		0.199		0.006
						Wilcoxon		5.180×10+7		29.947				4.737×10-197		0.75				0.308		0.01
lipo_A_repeat		-		lipo_A		Student		18.395				12139		1.471×10-74		2.481		0.135		0.167		0.003
						Wilcoxon		4.415×10+7		19.88				6.088×10-88		1.435				0.209		0.011
phosphate_repeat		-		phosphate		Student		50.622				13306		0		0.072		0.001		0.439		0.009
						Wilcoxon		6.492×10+7		47.195				0		0.072				0.473		0.01
SHBG_repeat		-		SHBG		Student		17.618				13062		1.105×10-68		2.527		0.143		0.154		0.005
						Wilcoxon		5.509×10+7		28.876				2.409×10-183		2.855				0.292		0.01
bilirubin_ttl_repeat		-		bilirubin_ttl		Student		-11.782				16369		6.520×10-32		-0.276		0.023		-0.092		0.005
						Wilcoxon		5.831×10+7		-13.983				1.970×10-44		-0.275				-0.126		0.009
testos_repeat		-		testos		Student		3.458				14118		5.456×10-4		0.068		0.02		0.029		0.003
						Wilcoxon		5.130×10+7		3.183				0.001		0.031				0.031		0.01
protein_repeat		-		protein		Student		37.827				13348		1.522×10-297		1.325		0.035		0.327		0.009
						Wilcoxon		6.065×10+7		36.386				7.172×10-290		1.28				0.364		0.01
tri_repeat		-		tri		Student		-0.422				16501		0.673		-0.003		0.007		-0.003		0.007
						Wilcoxon		6.966×10+7		2.831				0.005		0.014				0.025		0.009
urate_repeat		-		urate		Student		17.22				16476		7.131×10-66		6.354		0.369		0.134		0.005
						Wilcoxon		7.926×10+7		18.803				7.152×10-79		6.35				0.169		0.009
VitD_repeat		-		VitD		Student		-11.35				15360		9.689×10-30		-1.828		0.161		-0.092		0.008
						Wilcoxon		5.055×10+7		-14.669				1.025×10-48		-2.2				-0.137		0.009
CRP_repeat		-		CRP		Student		0.564				16467		0.573		0.022		0.038		0.004		0.009
						Wilcoxon		6.856×10+7		3.374				7.408×10-4		0.025				0.031		0.009
IGF1_repeat		-		IGF1		Student		-20.719				16275		3.797×10-94		-0.609		0.029		-0.162		0.005
						Wilcoxon		5.276×10+7		-22.436				1.740×10-111		-0.623				-0.203		0.009
creatinine_repeat		-		creatinine		Student		28.889				16496		4.646×10-179		2.43		0.084		0.225		0.005
						Wilcoxon		8.785×10+7		34.277				1.698×10-257		2.15				0.309		0.009
oestradiol_repeat		-		oestradiol		Student		13.483				1656		2.177×10-39		152.806		11.333		0.331		0.03
						Wilcoxon		1.097×10+6		21.032				3.368×10-98		169.7				0.597		0.028
RF_repeat		-		RF		Student		13.732				1585		1.247×10-40		6.702		0.488		0.345		0.026
						Wilcoxon		930544		16.754				5.301×10-63		5.619				0.486		0.029
Note. For the Student t-test, effect size is given by Cohen's d . For the Wilcoxon test, effect size is given by the matched rank biserial correlation.
Note. For the Student t-test, location parameter is given by mean difference d . For the Wilcoxon test, location parameter is given by the Hodges-Lehmann estimate.

## Sheet: Suppl Table 2
Supplementary Table 2: Pearson r intercorrelations between biomarkers (timepoint 1)
	albumin	alk_phosphate	alanine	LDL	HDL	aspartate	bilirubin_dir	calcium	total_chol	creatinine	ApoA	ApoB	cystatin_c	gamma_glut	glucose	hba1c	lipo_A	phosphate	SHBG	bilirubin_ttl	testos	protein	tri	VitD	CRP	IGF1
	1
Alkaline phosphate	-0.0339**	1
alanine	0.0914***	0.166***	1
LDL	0.116***	0.021	0.0293**	1
HDL	0.0982***	-0.0836***	-0.233***	0.0874***	1
aspartate	0.0811***	0.154***	0.755***	-0.015	-0.0728***	1
bilirubin direct	0.0908***	-0.0350**	0.0738***	-0.216***	-0.0447***	0.101***	1
Calcium	0.521***	0.0592***	0.0840***	0.147***	0.146***	0.0957***	0.0209	1
total_chol	0.136***	0.00734	-0.0175	0.948***	0.344***	-0.0242*	-0.238***	0.174***	1
Creatinine	0.0083	-0.0444***	0.141***	-0.0450***	-0.307***	0.111***	0.149***	0.00716	-0.117***	1
ApoA	0.125***	-0.0672***	-0.185***	0.0831***	0.921***	-0.0466***	-0.0512***	0.171***	0.342***	-0.273***	1
ApoB	0.101***	0.0308**	0.0886***	0.955***	-0.0565***	0.0161	-0.197***	0.129***	0.874***	-0.00352	-0.0502***	1
cystatin_c	-0.134***	0.154***	0.138***	-0.0274*	-0.300***	0.108***	0.0707***	0.0207	-0.0926***	0.545***	-0.232***	0.0261*	1
gamma_glut	0.0485***	0.272***	0.465***	0.0460***	-0.120***	0.370***	0.0554***	0.0838***	0.0320**	0.120***	-0.0661***	0.0801***	0.119***	1
glucose	-0.00458	0.0596***	0.104***	-0.103***	-0.0958***	0.0602***	-0.00114	0.0560***	-0.112***	0.0102	-0.0701***	-0.0611***	0.0361***	0.0903***	1
hba1c	-0.0737***	0.0931***	0.123***	-0.119***	-0.134***	0.0848***	-0.0717***	0.0229*	-0.133***	0.0420***	-0.106***	-0.0664***	0.138***	0.112***	0.561***	1
lipo_A	-0.0276*	0.0158	0.00244	0.0661***	0.0145	0.00323	-0.0191	-0.00583	0.0591***	0.0179	0.00701	0.0668***	0.00952	0.00354	-0.0168	-0.00449	1
phosphate	0.0921***	-5.87e-05	-0.0640***	0.0379***	0.177***	-0.0253*	-0.0759***	0.190***	0.0860***	-0.111***	0.164***	0.00778	-0.0252*	-0.0470***	-0.106***	0.0191	0.0207	1
SHBG	-0.0603***	-0.0623***	-0.219***	-0.0373***	0.417***	-0.0773***	-0.0492***	-0.00762	0.0517***	-0.316***	0.355***	-0.0935***	-0.194***	-0.174***	-0.0908***	-0.150***	-0.0112	0.104***	1
Bilirubin total	0.113***	-0.0430***	0.0489***	-0.0024	-0.0271*	0.0717***	0.929***	0.0442***	-0.0308**	0.119***	-0.0292**	0.0102	0.0421***	0.0205	-0.0295**	-0.103***	-0.0127	-0.0526***	-0.0546***	1
testos	0.0478***	-0.0639***	0.169***	-0.0127	-0.343***	0.154***	0.214***	-0.0919***	-0.106***	0.513***	-0.314***	0.0326**	0.207***	0.150***	-0.0127	-0.00594	-0.00198	-0.236***	-0.275***	0.182***	1
protein	0.512***	0.0916***	0.0972***	0.153***	0.0664***	0.129***	-0.0049	0.523***	0.150***	-0.00168	0.0880***	0.141***	-0.00156	0.107***	0.0229*	0.0162	0.0126	0.0933***	-0.0440***	0.0127	-0.0103	1
Triglyceride	0.0381***	0.116***	0.266***	0.221***	-0.474***	0.124***	-0.115***	0.0543***	0.185***	0.190***	-0.315***	0.291***	0.215***	0.230***	0.119***	0.146***	-0.0216*	-0.0290**	-0.369***	-0.0287**	0.122***	0.0345**	1
Vitamin D	-6.99e-05	-0.0603***	-0.0815***	-0.0921***	0.0917***	0.0118	0.0647***	0.0655***	-0.0744***	0.0658***	0.0746***	-0.0994***	0.00475	-0.0345**	-0.0585***	-0.0379***	-0.00222	0.0376***	0.0717***	0.0517***	0.0388***	-0.0242*	-0.158***	1
CRP	-0.147***	0.177***	0.0480***	0.00347	-0.0936***	0.0241*	-0.0578***	-0.0536***	-0.0204	-0.0142	-0.0958***	0.0332**	0.145***	0.106***	0.0411***	0.0873***	0.0177	-0.0355***	-0.0852***	-0.0669***	-0.0485***	0.0601***	0.0580***	-0.0406***	1
IGF1	0.153***	-0.0411***	-0.0609***	-0.0223*	-0.0473***	-0.118***	0.0359***	0.0711***	-0.0301**	0.0785***	-0.0585***	-0.0371***	-0.0439***	-0.0560***	-0.0637***	-0.0868***	0.0141	0.0314**	-0.180***	0.0527***	0.0415***	0.0372***	0.00958	0.0367***	-0.0884***	1

## Sheet: Suppl Table 3
Supplementary Table 3: APOE e genotypic frequencies
Genotype	N	Percent
e2e2	110	0.62
e2e3	2153	12.08
e2e4	446	2.5
e3e3	10405	58.4
e3e4	4275	23.99
e4e4	428	2.4
Total	17817	100

## Sheet: Suppl Table 4
Supplementary Table 4: full model results for timepoint 2 apolipoprotein-b (ApoB) levels (N=12,209)
	Estimate	P-value	Lower 95% CI	Upper 95% CI
APOE e2 presence	-0.054	<0.001	-0.063	-0.045
APOE e4 presence	0.0183445	<0.001	0.0115241	0.0251649
Age	-0.0019183	<0.001	-0.0023695	-0.0014671
Sex	-0.0435691	<0.001	-0.04991	-0.0372282
PCA 1	-0.0011192	0.292	-0.0032014	0.0009631
PCA 2	0.0013134	0.223	-0.0008012	0.003428
PCA 3	0.0010414	0.328	-0.0010442	0.003127
PCA 4	-0.0003656	0.646	-0.0019254	0.0011942
PCA 5	-1.58e-05	0.964	-0.0007066	0.0006751
PCA 6	0.0004998	0.619	-0.0014704	0.0024699
PCA 7	0.001049	0.247	-0.0007286	0.0028266
PCA 8	0.0002899	0.748	-0.0014772	0.0020569
PCA 9	-0.0001344	0.745	-0.000944	0.0006752
PCA 10	0.0006954	0.365	-0.000808	0.0021987
Genotypic chip	-0.0004135	0.938	-0.0108057	0.0099788
Townsend	-0.0008959	0.155	-0.0021303	0.0003385
Smoking status	-0.0015244	0.645	-0.0080192	0.0049703
Medication	-0.0366212	<0.001	-0.0439622	-0.0292802
ApoB baseline	0.620992	<0.001	0.606622	0.635362
Interval (in years)	-0.0079302	<0.001	-0.0115912	-0.0042692
Note that covariate estimates are based on the APOE e4 presence model, but are very similar to the APOE e2 model.

## Sheet: Suppl Table 5
Supplementary Table 5: linear regression estimates of change in blood biomarkers, and polygenic risk for Alzheimer’s Disease
Variable	Partially-adjusted model						Fully-adjusted model
	Estimate	Lower 95% CI	Upper 95% CI	P-value	N		Estimate	Lower 95% CI	Upper 95% CI	P-value	N
IGF-1	0.0487443	-0.0112735	0.108762	0.111419	14368		0.0525361	-0.0077926	0.112865	0.0878543	14259
CRP	0.0639915	-0.0023277	0.130311	0.0586002	14544		0.0668775	0.0008336	0.132921	0.047178	14433
Vitamin D	-0.187567	-0.503188	0.128055	0.244093	13584		-0.195746	-0.512382	0.120889	0.225621	13482
Triglycerides	-0.0008185	-0.0132836	0.0116466	0.897584	14573		-0.0002041	-0.0126821	0.0122738	0.974421	14463
Protein	0.0574093	-0.0101262	0.124945	0.0956879	11798		0.0544185	-0.0134001	0.122237	0.115778	11708
Testosterone	-0.0106976	-0.0505647	0.0291696	0.598919	12450		-0.0127734	-0.0528158	0.027269	0.531798	12357
Bilirubin	0.0189249	-0.0283513	0.0662012	0.432671	14460		0.0197959	-0.0277514	0.0673432	0.414467	14350
SHGB	-0.22627	-0.516611	0.0640716	0.126638	11544		-0.263933	-0.55371	0.0258427	0.0742294	11460
Phosphate	0.0017216	-0.0008598	0.0043031	0.191146	11763		0.001851	-0.0007404	0.0044423	0.161501	11673
Lipoprotein A	-0.0550831	-0.346308	0.236142	0.710827	10734		-0.0331024	-0.325391	0.259186	0.824321	10649
HbA1C	0.0309379	-0.0380908	0.0999666	0.379676	11301		0.0322738	-0.0366926	0.10124	0.359009	11221
Random Glucose	-0.0182098	-0.0350881	-0.0013315	0.0344678	11789		-0.0171562	-0.0339728	-0.0003396	0.0455499	11699
GGT	-0.0147427	-0.467399	0.437914	0.949099	14590		-0.0082503	-0.463664	0.447163	0.971674	14479
Cystatin-C	0.0008563	-0.0007282	0.0024408	0.289501	14590		0.0010519	-0.0005368	0.0026407	0.194365	14479
ApoB	0.0006127	-0.0023582	0.0035836	0.686021	14488		0.0004282	-0.0025385	0.0033948	0.777259	14378
ApoA	0.000297	-0.0029769	0.0035709	0.858885	11683		0.0003592	-0.0029267	0.003645	0.830342	11593
Creatinine	0.0850371	-0.0826066	0.252681	0.320107	14570		0.0878115	-0.0806315	0.256255	0.306874	14460
Total cholesterol	0.0068728	-0.007803	0.0215486	0.358665	14605		0.0062141	-0.0084227	0.0208508	0.405323	14494
Calcium	0.0016082	-5.31e-05	0.0032695	0.0577817	11809		0.0015874	-7.97e-05	0.0032544	0.0619952	11719
Bilirubin	0.0010829	-0.0099358	0.0121017	0.847237	11142		0.001329	-0.0097531	0.0124112	0.814152	11054
Aspartate	-0.0139094	-0.178008	0.150189	0.868045	14495		-0.0210084	-0.186178	0.144161	0.803122	14384
HDL	0.0014398	-0.0025241	0.0054037	0.476488	11805		0.0015842	-0.0024007	0.0055691	0.435831	11715
LDL	0.0043324	-0.0069289	0.0155937	0.450804	14535		0.003549	-0.0076785	0.0147764	0.535537	14424
Alanine	-0.0191414	-0.197084	0.158801	0.833005	14596		-0.0284732	-0.207139	0.150192	0.754758	14485
Alkaline phosphate	0.193342	-0.0880946	0.474779	0.178139	14601		0.182876	-0.100049	0.465801	0.205183	14490
Albumin	0.0254556	-0.0171382	0.0680494	0.241435	11810		0.0249708	-0.0178314	0.067773	0.252829	11721
95% CI = 95% confidence intervals. Significant P<0.002 highlighted in bold. CRP = C reactive Protein. IGF-1 = insulin-like growth factor 1. SHGB = Sex hormone binding globulin. Hba1C = glycated haemoglobin. H/LDL = high/low density lipoproteins. Partially adjusted: controlling for age at baseline, sex, 10 principal components for stratification, APOE e genotype, interval, and respective baseline …

## Sheet: Suppl Figure 1
	Supplementary Figure 1: ApoB trajectories across two timepoints for APOE genotypes
	Adjusted for: age at baseline, sex, smoking status, medication status, 10 principal components, genotypic chip, Townsend deprivation index, and interval in days.
